# Supplementary material for: Low-coordinate bis(imidazolin-2-iminato) dysprosium(iii) single-molecule magnets
Source: Royal Society of Chemistry journal article supplement (doi:10.1039/d2qi02180c), 2022-11-23
Supplement: d2qi02180c1.pdf [file d2qi02180c1.pdf]

*Supporting Information for*  
**Low-coordinate Bis(imidazolin-2-iminato) Dysprosium(III) Single-  
Molecule Magnets**

Rong Sun,<sup>§a</sup> Chen Wang,<sup>§a</sup> Bing-Wu Wang,<sup>\*a</sup> Zhe-Ming Wang,<sup>a</sup> Yao-Feng Chen,<sup>b</sup> Matthias Tamm,<sup>c</sup>  
and Song Gao<sup>\*a,b</sup>

|                                       |            |
|---------------------------------------|------------|
| <b>1. Experimental Details .....</b>  | <b>S2</b>  |
| <b>2. X-ray Crystallography .....</b> | <b>S3</b>  |
| <b>3. Magnetic Properties.....</b>    | <b>S8</b>  |
| <b>4. Theoretical Analysis .....</b>  | <b>S18</b> |
| <b>5. References.....</b>             | <b>S29</b> |

<sup>a</sup>Beijing National Laboratory for Molecular Sciences, State Key Laboratory of Rare Earth Materials Chemistry and Applications, College of Chemistry and Molecular Engineering, Peking University, Beijing 100871, *P. R. China*. E-mail: [wangbw@pku.edu.cn](mailto:wangbw@pku.edu.cn); [gaosong@pku.edu.cn](mailto:gaosong@pku.edu.cn)

<sup>b</sup>Spin-X Institute, School of Chemistry and Chemical Engineering, State Key Laboratory of Luminescent Materials and Devices, Guangdong-Hong Kong-Macao Joint Laboratory of Optoelectronic and Magnetic Functional Materials, South China University of Technology, Guangzhou 510641, *P. R. China*.

<sup>c</sup>Institut für Anorganische und Analytische Chemie, Technische Universität Carolo-Wilhelmina, Hagenring 30, 38106 Braunschweig, Germany

<sup>§</sup>These authors contributed equally to this work.

## 1. Experimental Details

**General:** All operations were carried out under an atmosphere of argon using Schlenk techniques or in an argon filled glovebox. Toluene and hexane were collected from a Vigor YJC-5 Solvent Purification System under argon, transferred to the glove box without exposure to air, and stored in glovebox. Tetrahydrofuran (THF) were dried over  $\text{LiAlH}_4$ , transferred under vacuum, and stored in the glovebox. Anhydrous  $\text{DyI}_3$  was commercially available and used without further purification. Benzyl dysprosium(III) complex  $([\text{DyBn}_3(\text{THF})_3])^1$ , triethylammonium tetraphenylborate  $([\text{HNEt}_3][\text{BPh}_4])^2$  and 1,3-bis(2,6-diisopropylphenyl) imidazolin-2-imine ( $\text{Im}^{\text{DippNH}}$ )<sup>3</sup> were synthesized according to literature procedures.

**Synthesis of  $[\text{Dy}(\text{Im}^{\text{DippN}})_2(\text{Bn})(\text{THF})]$  (**1**):**  $[\text{DyBn}_3(\text{THF})_3]$  (196 mg, 0.30 mmol) and  $\text{Im}^{\text{DippNH}}$  (242 mg, 0.60 mmol) were separately dissolved in cooled toluene, and then the  $\text{Im}^{\text{DippNH}}$  solution was dropwise added to the  $[\text{DyBn}_3(\text{THF})_3]$  solution with rapid stirring. The reaction mixture was stirred at room temperature for 30 minutes and then filtered. The yellow filtrate was concentrated to 2 mL at room temperature under reduced pressure. After standing at room temperature overnight, yellow crystals of **1** (203 mg, 0.18 mmol, 60% yield) were obtained. Anal. Calcd. for  $\text{C}_{65}\text{H}_{87}\text{DyN}_6\text{O}$ : C, 69.03; H, 7.75; N, 7.43. Found C, 69.58; H, 7.54; N, 7.32.

**Synthesis of  $[\text{Dy}(\text{Im}^{\text{DippN}})_2(\text{BPh}_4)]$  (**2**):** Crystals of **1** (339 mg, 0.30 mmol) was dissolved in toluene, and then treated with  $[\text{HNEt}_3][\text{BPh}_4]$  (126 mg, 0.30 mmol). The reaction mixture was stirred at room temperature for 30 minutes and then filtered. The yellow filtrate was concentrated to 2 mL at room temperature under reduced pressure. After standing at room temperature overnight, yellow crystals of **2** (289 mg, 0.21 mmol, 70% yield) were obtained. Anal. Calcd. for  $\text{C}_{78}\text{H}_{92}\text{BDyN}_6(\text{C}_7\text{H}_8)$ : C, 74.03; H, 7.31; N, 6.09. Found C, 74.16; H, 7.46; N, 5.75.

## 2. X-ray Crystallography.

The single crystal of **1** and **2** covered in grease was mounted under nitrogen atmosphere on a glass fiber. The diffraction data were collected at 180 K using a Rigaku Oxford diffractometer equipped with a CCD collector using Mo K $\alpha$  radiation ( $\lambda = 0.71073 \text{ \AA}$ ). Using Olex2, the structures were solved with the ShelXT structure solution program using Direct Methods or Patterson Method and refined with the ShelXL refinement package using Least Squares minimisation. Hydrogen atoms were placed at calculated positions and were included in the structure calculation. Crystallographic data and refinement for **1** and **2** are listed in Table S1.

**Table S1.** Crystallographic Data and Refinement parameters of **1** and **2**.

|                                                           | <b>1</b>                                           | <b>2</b>                                                                            |
|-----------------------------------------------------------|----------------------------------------------------|-------------------------------------------------------------------------------------|
| Formula                                                   | C <sub>65</sub> H <sub>87</sub> DyN <sub>6</sub> O | C <sub>78</sub> H <sub>92</sub> BDyN <sub>6</sub> ·(C <sub>7</sub> H <sub>8</sub> ) |
| Formula Weight                                            | 1130.9                                             | 1379.1                                                                              |
| Color                                                     | yellow                                             | yellow                                                                              |
| Crystal System                                            | triclinic                                          | orthorhombic                                                                        |
| Space Group                                               | <i>P</i> 1                                         | <i>Fdd</i> 2                                                                        |
| <i>a</i> , Å                                              | 11.64130(10)                                       | 64.3659(5)                                                                          |
| <i>b</i> , Å                                              | 12.2918(2)                                         | 36.0437(4)                                                                          |
| <i>c</i> , Å                                              | 23.6245(3)                                         | 14.09180(10)                                                                        |
| <i>α</i> , deg                                            | 97.9620(10)                                        | 90                                                                                  |
| <i>β</i> , deg                                            | 96.6210(10)                                        | 90                                                                                  |
| <i>γ</i> , deg                                            | 114.1740(10)                                       | 90                                                                                  |
| <i>V</i> , Å <sup>3</sup>                                 | 2998.44(7)                                         | 32692.8(5)                                                                          |
| <i>Z</i>                                                  | 2                                                  | 16                                                                                  |
| <i>D</i> <sub>calcd</sub> , (g/cm <sup>3</sup> )          | 1.253                                              | 0.345                                                                               |
| <i>F</i> (000)                                            | 1186.0                                             | 3553.0                                                                              |
| <i>T</i> (K)                                              | 180.00(10)                                         | 180.00(10)                                                                          |
| <i>θ</i> range, deg                                       | 2.031, 30.219                                      | 2.209, 29.520                                                                       |
| No. of refns collected                                    | 96666                                              | 140728                                                                              |
| No. of unique refns                                       | 16182                                              | 21196                                                                               |
| No. of obsd refns ( <i>I</i> > 2σ( <i>I</i> ))            | 14971                                              | 16327                                                                               |
| No. of params                                             | 694                                                | 791                                                                                 |
| Final <i>R</i> , <i>wR</i> 2 ( <i>I</i> > 2σ( <i>I</i> )) | 0.0432, 0.1269                                     | 0.0404, 0.0810                                                                      |
| Goodness-of-fit on <i>F</i> <sup>2</sup>                  | 1.360                                              | 0.972                                                                               |
| Δρ <sub>max, min</sub> , eÅ <sup>-3</sup>                 | 2.218, -2.195                                      | 0.195, -0.438                                                                       |

**Table S2.** Selected bond distances [ $\text{\AA}$ ] and angles [deg] of **1**.

|                       | <b>1</b>               |
|-----------------------|------------------------|
| N–Dy–N (deg)          | 123.21(13)             |
| N–Dy–C (deg)          | 104.78(14), 110.65(15) |
| N–Dy–O (deg)          | 97.95(12), 102.23(12)  |
| Dy–N ( $\text{\AA}$ ) | 2.132(3), 2.145(4)     |
| Dy–C ( $\text{\AA}$ ) | 2.464(4)               |
| Dy–O ( $\text{\AA}$ ) | 2.339(3)               |

**Table S3.** Selected bond distances [ $\text{\AA}$ ] and angles [deg] of **2**.

|                                              | <b>2</b>                                                                                                                                                                                                                                           |
|----------------------------------------------|----------------------------------------------------------------------------------------------------------------------------------------------------------------------------------------------------------------------------------------------------|
| N–Dy–N (deg)                                 | 118.28(15)                                                                                                                                                                                                                                         |
| N–Dy–C (deg)                                 | 80.81(14), 94.25(16), 91.21(14), 118.60(14),<br>93.13(13), 117.88(14), 120.43(13), 137.32(14),<br>134.63(14), 121.20(16), 116.09(16), 88.57(16),<br>137.67(14), 117.82(14), 129.91(14), 82.13(14),<br>113.24(13), 85.86(15), 91.11(14), 73.85(15), |
| N–Dy–Ph <sub>centroid</sub> * (deg)          | 106.16, 109.93, 101.99, 109.10                                                                                                                                                                                                                     |
| Dy–N ( $\text{\AA}$ )                        | 2.157(4), 2.120(4)                                                                                                                                                                                                                                 |
| Dy–C ( $\text{\AA}$ )                        | 2.855(4), 2.926(5), 2.880(4), 2.964(5), 2.888(4),<br>2.887(5), 2.872(5), 2.915(5), 2.911(4), 2.911(5)                                                                                                                                              |
| Dy–Ph <sub>centroid</sub> * ( $\text{\AA}$ ) | 2.577, 2.547                                                                                                                                                                                                                                       |

\*Ph<sub>centroid</sub> represents the center of the coordinated phenyl.

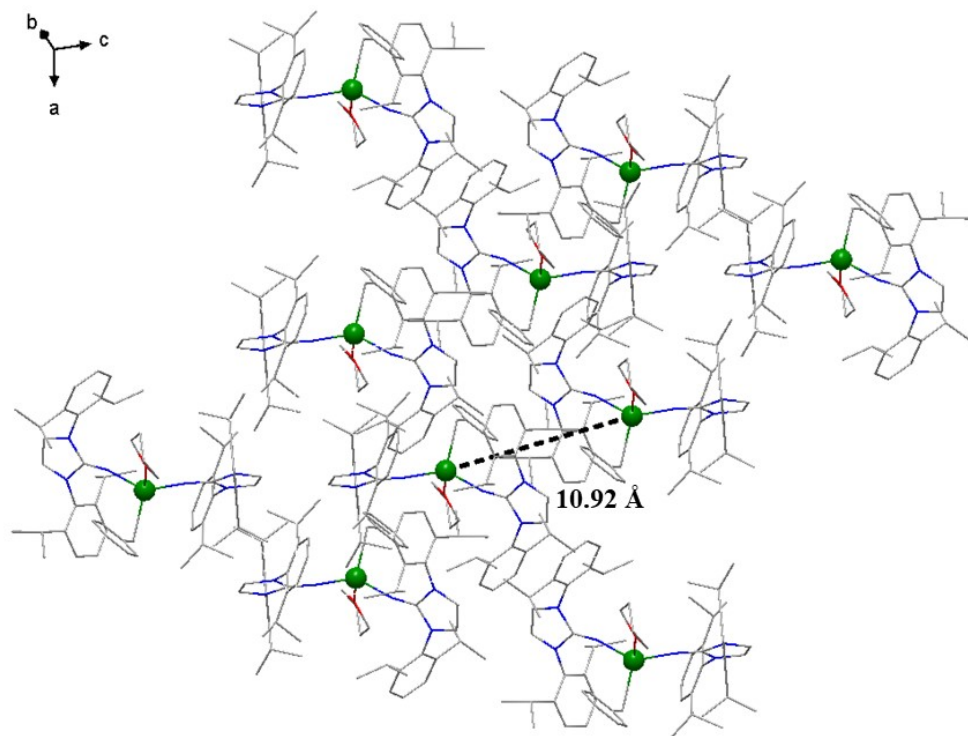

**Figure S1.** The molecular packing in **1**. Color codes: Dy, green; N, blue; O, red; C, grey; For clarity, hydrogen atoms are omitted.

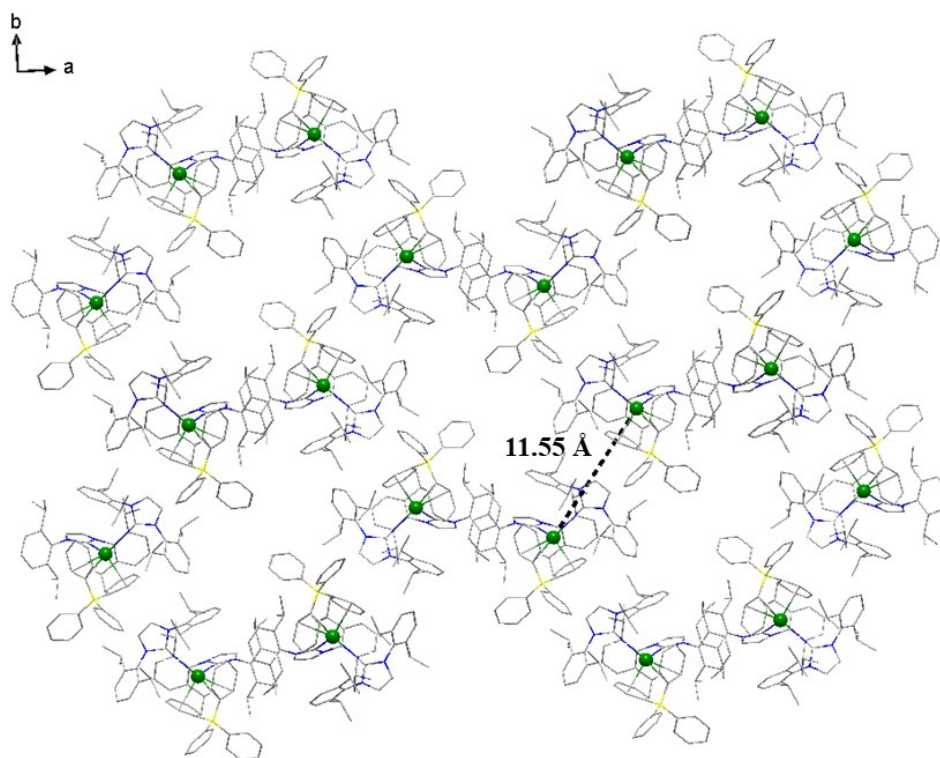

**Figure S2.** The molecular packing in **2**. Color codes: Dy, green; N, blue; B, yellow; C, grey; For clarity, hydrogen atoms are omitted.

### **3. Magnetic Properties**

The samples were packed in capsules with N-grease and parafilm covered to protect them from air and water. DC mode was adopted for the measurements of susceptibility and magnetization, while VSM mode was selected for hysteresis and ZFC-FC measurements on Quantum Design MPMS3 magnetometer. Ac magnetic measurements were performed both on Quantum Design PPMS magnetometer (100 ~ 10000 Hz). The background of sample holders (capsule, parafilm and N-grease) and Pascal correction were considered when the diamagnetic correction was carried on the data.



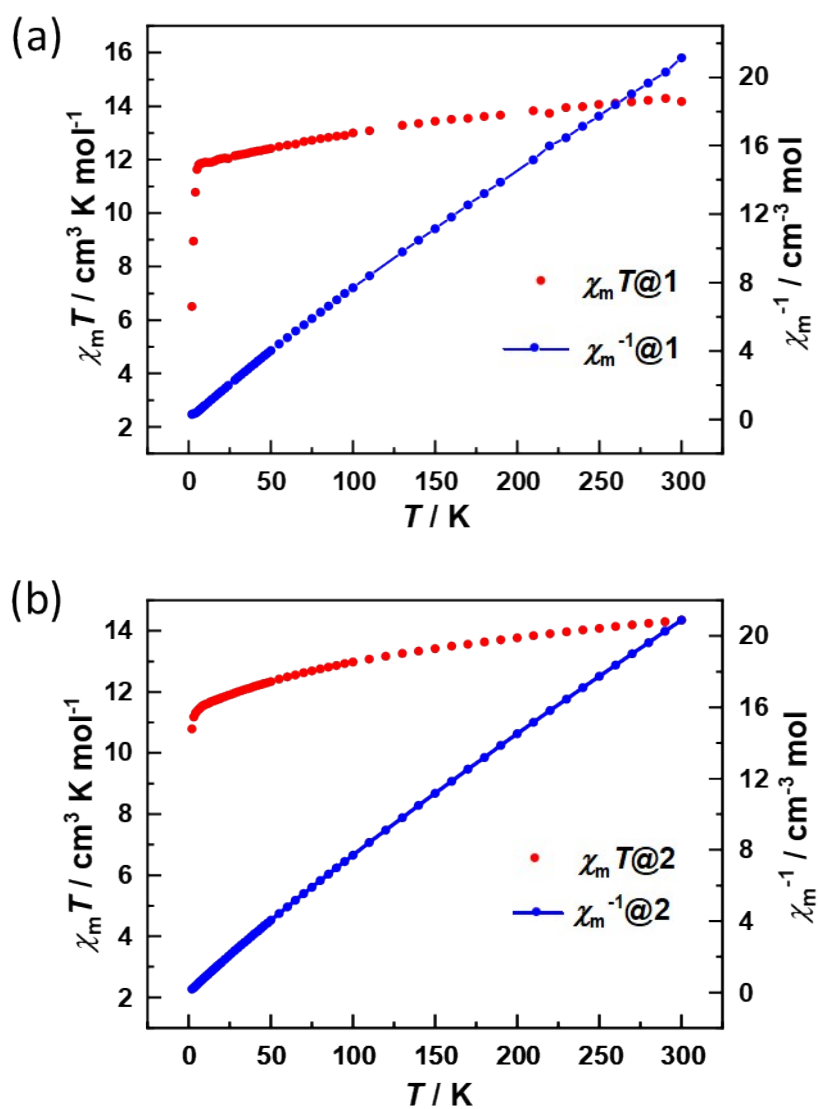

**Figure S3.** Temperature dependence of  $\chi_m T$  and  $\chi_m^{-1}$  for **1** (a) and **2** (b) at 1 kOe dc field.

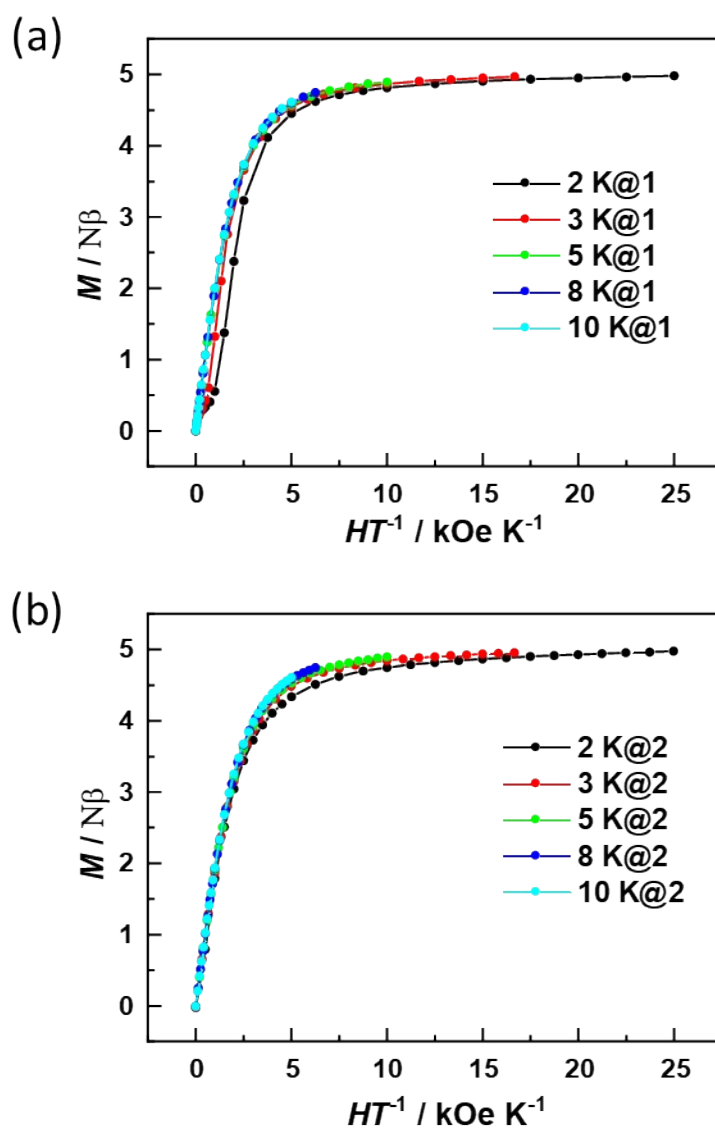

**Figure S4.** Plots of magnetization  $M$  versus  $H/T$  at the temperature of 2 K, 3 K, 5 K, 8 K and 10 K for **1** (a) and **2** (b).

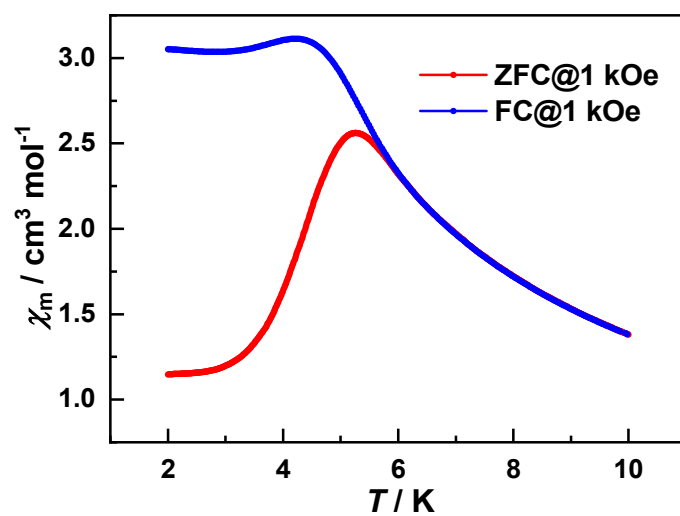

**Figure S5.** Zero-field-cooled (ZFC) magnetization and field-cooled (FC) magnetization of **1** under 1 kOe at sweep rate of 3 K min<sup>-1</sup> with the lines are guides for the eyes.

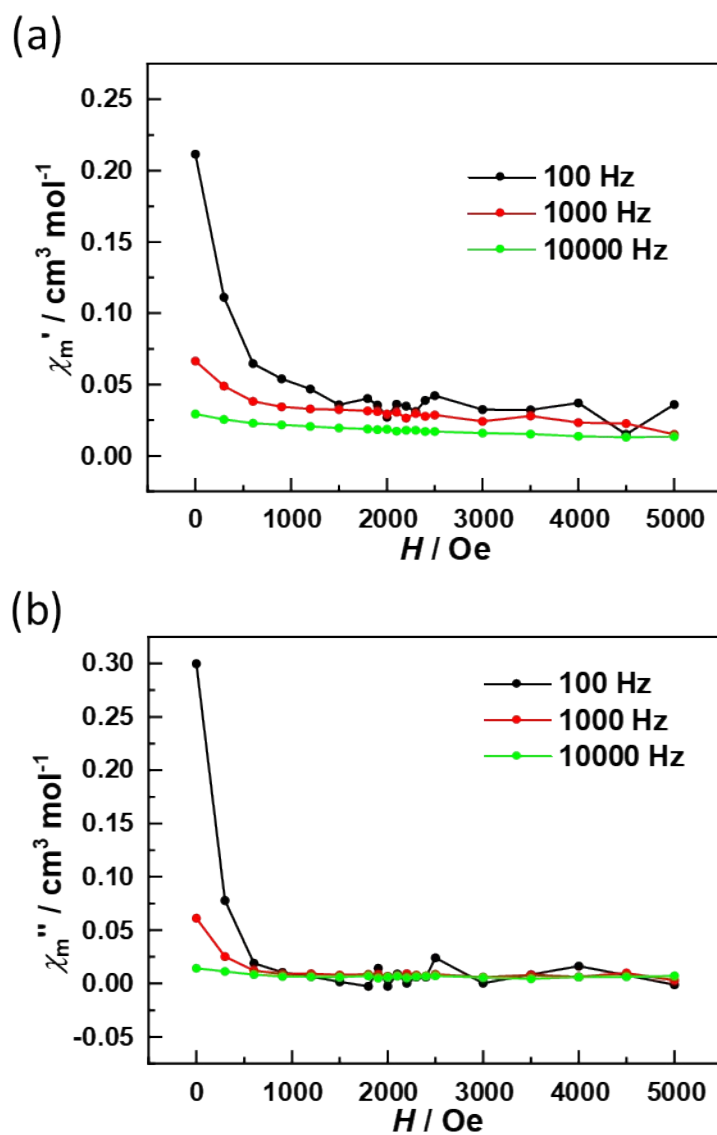

**Figure S6.** Plots of field dependent in-phase ( $\chi_m'$ ) and out-of-phase ( $\chi_m''$ ) component of ac susceptibility of **1** at 2 K.

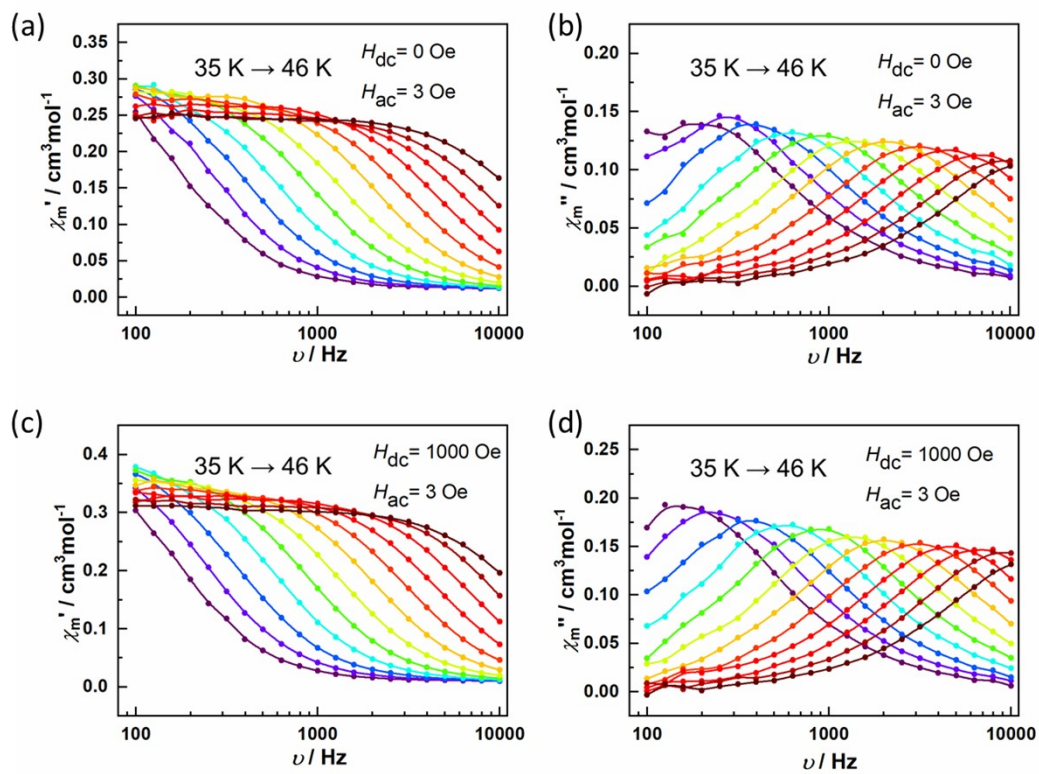

**Figure S7.** Plots of frequency dependent in-phase ( $\chi_m'$ ) and out-of-phase ( $\chi_m''$ ) component of ac susceptibility of **1** at zero field and 1000 Oe dc field.

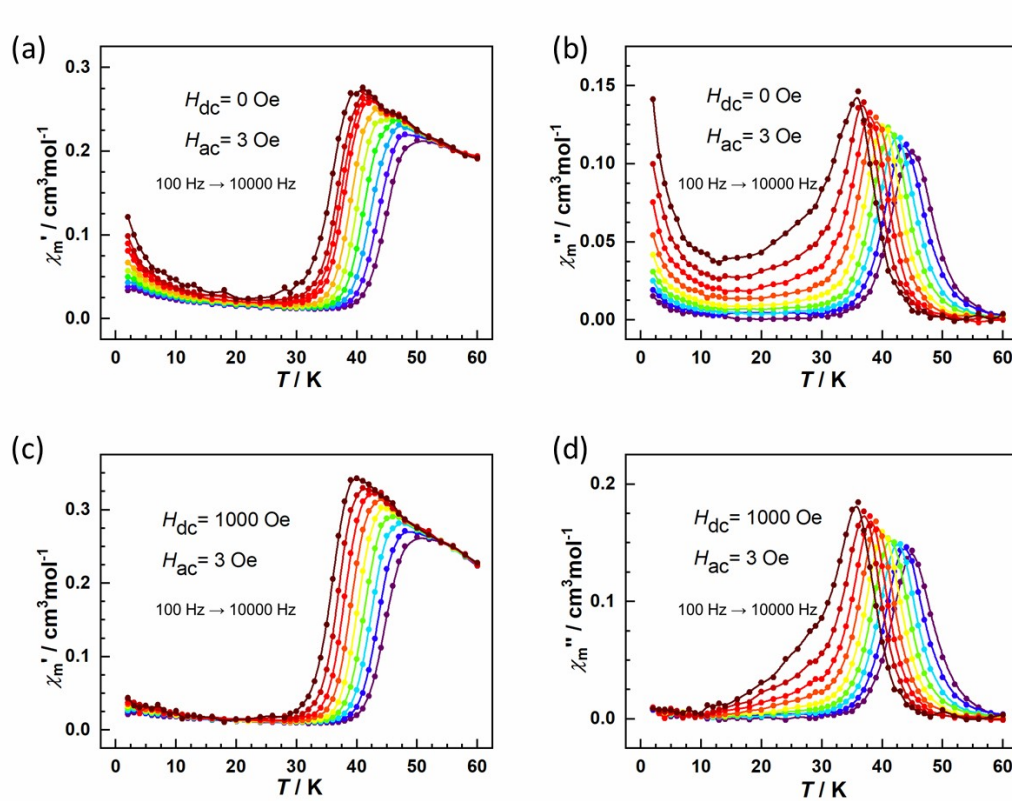

**Figure S8.** Plots of temperature dependent in-phase ( $\chi_m'$ ) and out-of-phase ( $\chi_m''$ ) component of ac susceptibility of **1** under zero field and 1000 Oe dc field.

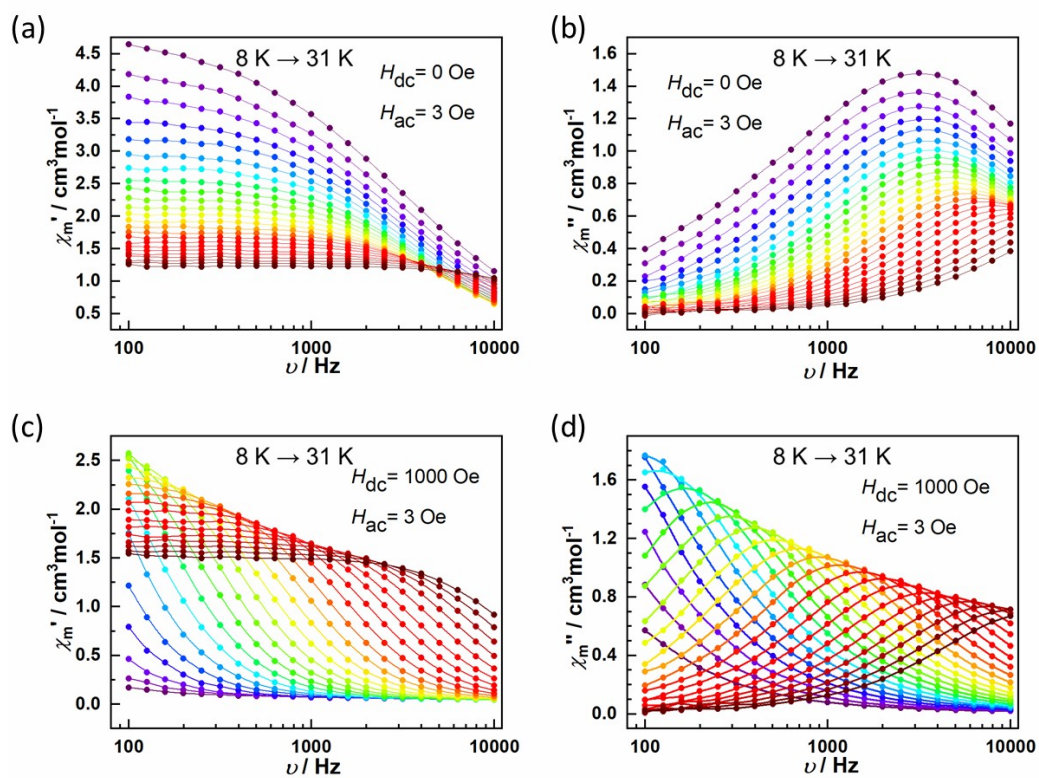

**Figure S9.** Plots of frequency dependent in-phase ( $\chi_m'$ ) and out-of-phase ( $\chi_m''$ ) component of ac susceptibility of **2** at zero field and 1000 Oe dc field.

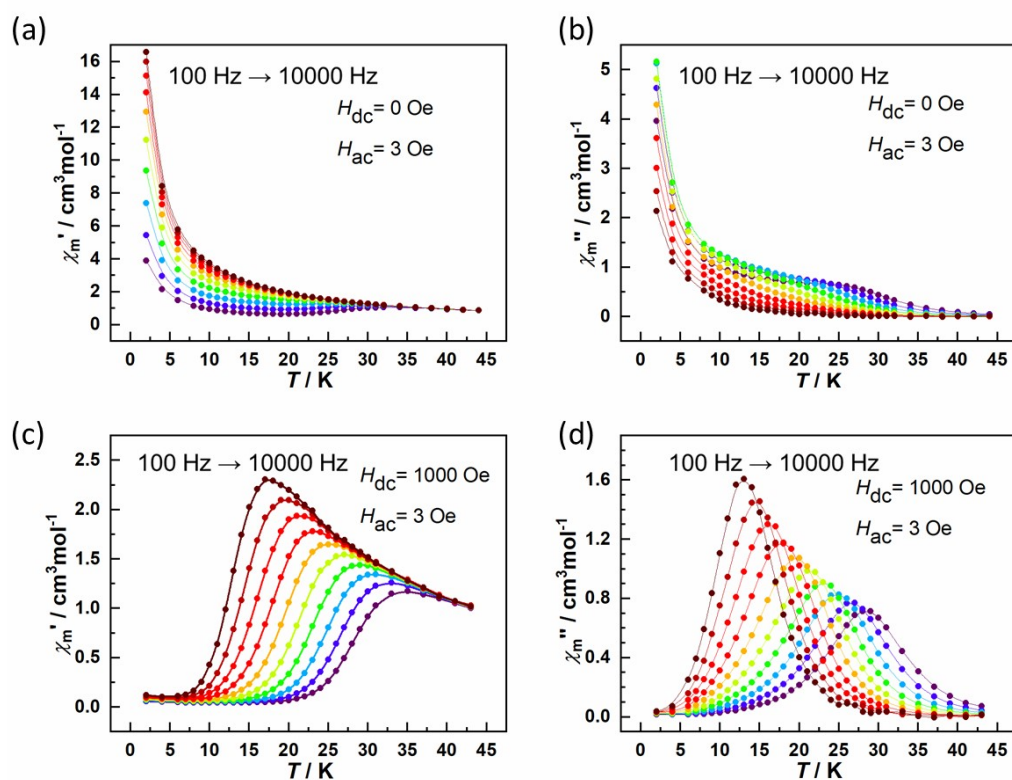

**Figure S10.** Plots of temperature dependent in-phase ( $\chi_m'$ ) and out-of-phase ( $\chi_m''$ ) component of ac susceptibility of **2** under zero field and 1000 Oe dc field.



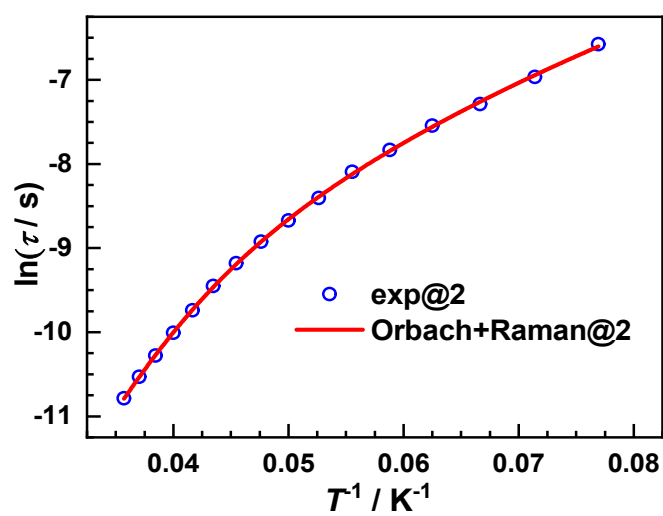

**Figure S11.** The  $\ln\tau$  versus  $T^{-1}$  plots at 1000 Oe dc field for **2**. The solid lines represent the fitting results.

#### 4. Theoretical Analysis

*Ab initio* calculations were performed with MOLCAS 8.1 program<sup>4</sup>. For complex **1** and **2**, the calculation fragments were all built based on the crystal structures. The basis sets for all atoms are atomic natural orbitals from the MOLCAS ANO-RCC library<sup>5-6</sup>: ANO-RCC-VTZP for Dy(III) ions; VTZ for close N/O/C; VDZ for distant atoms. The calculations employed the second order Douglas-Kroll-Hess Hamiltonian, where scalar relativistic contractions were considered in the basis sets and the spin-orbit couplings were handled in the restricted active space state interaction (RASSI-SO) procedure. We have mixed the maximum number of spin-free states which was possible with our hardware (all from 21 sextets, 128 from 224 quadruplets, 130 from 490 doublets for the Dy(III) fragment). Active electrons in seven active spaces include all f electrons (CAS (9, 7)) of Dy (III) in the CASSCF calculation. For model fragment  $[\text{Dy}(\text{N}^{\text{RR}'})_2]^+$  and  $[\text{Dy}(\text{Im}^{\text{DippN}})_2]^+$ , the basis sets are: ANO-RCC-VTZP for Dy(III) ions; VTZ for close N/C; VDZ for distant atoms. The predicted  $U_{\text{eff}}$  versus the angles of N–Dy–N for  $[\text{Dy}(\text{Im}^{\text{DippN}})_2]^+$  fragment was fitted using quadratic function (Table S8).

Model molecule  $[\text{Dy}(\text{Im}^{\text{DippN}})_2(\text{THF})_4]^+$  was constructed based on the crystal structure of  $[\text{Dy}\{\text{OB}(\text{NArCH})_2\}_2(\text{THF})_4]^+$  by replacing B–O with C–N and optimized based on Density Function Theory (DFT) employing the B3LYP functional<sup>7-8</sup> in Gaussian 09<sup>9</sup>. During the optimization, the dysprosium(III), the coordinated O and N were frozen. Then *ab initio* calculation at the same level of theory was conducted. The basis sets are: ANO-RCC-VTZP for Dy(III) ions; VTZ for close N/O; VDZ for distant atoms. Model molecule  $[\text{Dy}(\text{Im}^{\text{DippN}})_2(\text{THF})_3]^+$  was constructed by removing one THF molecule of  $[\text{Dy}(\text{Im}^{\text{DippN}})_2(\text{THF})_4]^+$ , and adjusting the N–Dy–N angle to be 180°, O–Dy–O angle to be 90°. Then *ab initio* calculation at the same level of theory was also conducted.

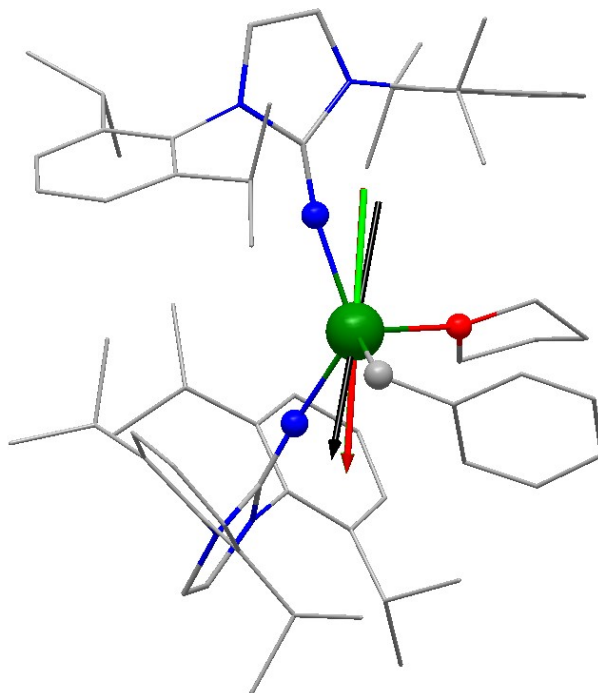

**Figure S12.** Orientations of easy axis of the KDs on Dy(III) for **1**. The green arrow represents the ground KDs, the red stands for the first excited KDs and the black corresponds to the second excited KDs. Color codes: Dy, green; N, blue; O, red; C, grey; For clarity, hydrogen atoms are omitted.

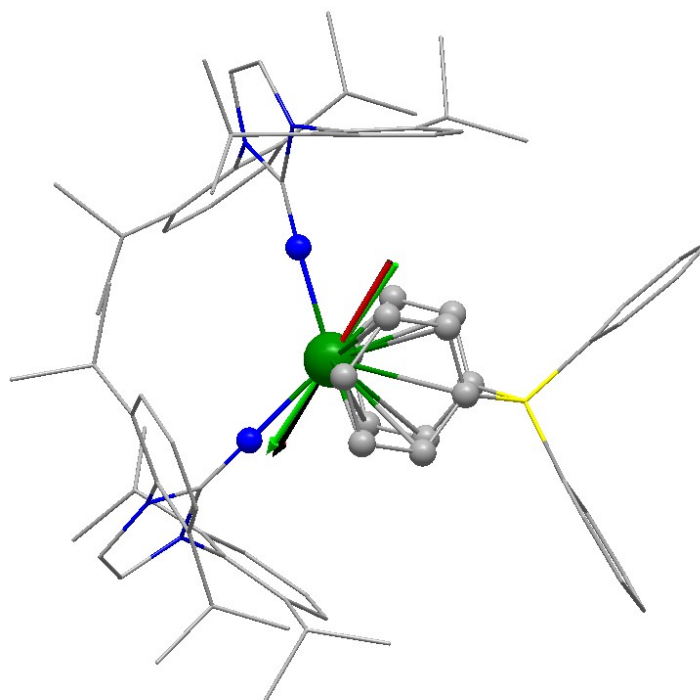

**Figure S13.** Orientations of easy axis of the KDs on Dy(III) for **2**. The green arrow represents the ground KDs, the red stands for the first excited KDs and the black corresponds to the second excited KDs. Color codes: Dy, green; N, blue; O, red; C, grey; B: yellow. For clarity, hydrogen atoms are omitted.

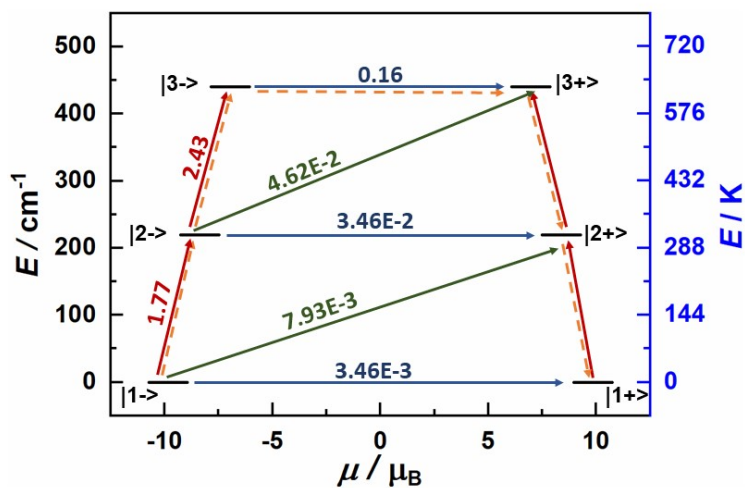

**Figure S14.** The magnetic blocking barriers for **2**. The thick black lines represent the KDs as a function of their magnetic moment along the magnetic axis. The blue lines within KDs correspond to quantum tunneling of magnetization (QTM), and the numbers at each arrow represent the mean absolute value of the corresponding matrix element of transition magnetic moment. The orange dashed arrows show the deduced relaxation pathway.

**Table S4.** Calculated energy levels and  $g$  ( $g_x, g_y, g_z$ ) tensors of the lowest Kramers doublets (KDs) of individual Dy(III) fragment for **1** and **2**.

| KDs | <b>1</b>             |                |        | <b>2</b>             |                |        |
|-----|----------------------|----------------|--------|----------------------|----------------|--------|
|     | $E / \text{cm}^{-1}$ | $E / \text{K}$ | $g$    | $E / \text{cm}^{-1}$ | $E / \text{K}$ | $g$    |
|     |                      |                | 0.002  |                      |                | 0.008  |
| 1   | 0.0                  | 0.0            | 0.002  | 0.0                  | 0.0            | 0.013  |
|     |                      |                | 19.817 |                      |                | 19.685 |
|     |                      |                | 0.043  |                      |                | 0.093  |
| 2   | 234.8                | 337.6          | 0.058  | 219.4                | 315.6          | 0.107  |
|     |                      |                | 17.021 |                      |                | 16.775 |
|     |                      |                | 1.459  |                      |                | 0.418  |
| 3   | 362.2                | 520.8          | 2.620  | 440.3                | 633.2          | 0.507  |
|     |                      |                | 14.296 |                      |                | 13.959 |
|     |                      |                | 1.370  |                      |                | 1.679  |
| 4   | 416.1                | 598.4          | 4.229  | 636.7                | 915.5          | 2.332  |
|     |                      |                | 9.634  |                      |                | 11.100 |
|     |                      |                | 4.527  |                      |                | 0.171  |
| 5   | 497.6                | 715.5          | 5.165  | 790.8                | 1137.2         | 3.507  |
|     |                      |                | 8.900  |                      |                | 8.647  |
|     |                      |                | 0.810  |                      |                | 3.026  |
| 6   | 592.1                | 851.5          | 1.163  | 885.4                | 1273.2         | 5.601  |
|     |                      |                | 13.987 |                      |                | 8.464  |
|     |                      |                | 0.034  |                      |                | 1.461  |
| 7   | 725.5                | 1043.3         | 0.059  | 948.6                | 1364.1         | 3.617  |
|     |                      |                | 17.296 |                      |                | 15.900 |
|     |                      |                | 0.001  |                      |                | 0.039  |
| 8   | 990.0                | 1423.6         | 0.001  | 1062.4               | 1527.7         | 0.139  |
|     |                      |                | 19.838 |                      |                | 19.595 |

**Table S5.** Wave functions with definite projection of the total moment  $|m_j\rangle$  for of the lowest Kramers doublets (KDs) of individual Dy(III) fragment for **1** and **2**.

|          | $E /$<br>$\text{cm}^{-1}$ | wave functions                                                                                                                                                               |
|----------|---------------------------|------------------------------------------------------------------------------------------------------------------------------------------------------------------------------|
| <b>1</b> | 0.0                       | 99.6% $ \pm 15/2\rangle$                                                                                                                                                     |
|          | 234.8                     | 93.4% $ \pm 13/2\rangle$ +2.7% $ \pm 11/2\rangle$ +3.0% $ \pm 9/2\rangle$                                                                                                    |
|          | 362.2                     | 38.9% $ \pm 11/2\rangle$ +9.3% $ \pm 9/2\rangle$ +16.1% $ \pm 7/2\rangle$ +10.4% $ \pm 5/2\rangle$ +10.9% $ \pm 3/2\rangle$ +9.9% $ \pm 1/2\rangle$ +4.4% $ \pm 13/2\rangle$ |
| <hr/>    |                           |                                                                                                                                                                              |
| <b>2</b> | 0.0                       | 98.1% $ \pm 15/2\rangle$                                                                                                                                                     |
|          | 219.4                     | 94.6% $ \pm 13/2\rangle$ +4.4% $ \pm 9/2\rangle$                                                                                                                             |
|          | 440.3                     | 88.2% $ \pm 11/2\rangle$ +7.4% $ \pm 7/2\rangle$ +1.9% $ \pm 15/2\rangle$                                                                                                    |

**Table S6.** Calculated energy levels and  $g$  ( $g_x$ ,  $g_y$ ,  $g_z$ ) tensors of the lowest Kramers doublets (KDs) of individual Dy(III) fragment for artificial structure  $[\text{Dy}(\text{Im}^{\text{DippN}})_2]^+$  with different N–Dy–N angles.

| N–Dy–N<br>/ deg | 123.2  |                      | 133.2  |                      | 143.2  |                      | 153.2  |                      | 163.2  |                      | 173.2  |                      |       |
|-----------------|--------|----------------------|--------|----------------------|--------|----------------------|--------|----------------------|--------|----------------------|--------|----------------------|-------|
|                 | KDs    | $E / \text{cm}^{-1}$ | $g$    | $E / \text{cm}^{-1}$ | $g$   |
| <b>1</b>        |        |                      | 0.000  |                      | 0.000  |                      | 0.000  |                      | 0.000  |                      | 0.000  |                      | 0.000 |
|                 | 0.0    | 0.000                | 0.0    | 0.000                | 0.0    | 0.000                | 0.0    | 0.000                | 0.0    | 0.000                | 0.0    | 0.000                | 0.000 |
|                 |        | 19.771               |        | 19.803               |        | 19.828               |        | 19.851               |        | 19.874               |        | 19.895               |       |
| <b>2</b>        |        |                      | 0.000  |                      | 0.000  |                      | 0.000  |                      | 0.000  |                      | 0.000  |                      | 0.000 |
|                 | 494.7  | 0.000                | 589.0  | 0.000                | 669.2  | 0.000                | 732.5  | 0.000                | 776.9  | 0.000                | 800.1  | 0.000                | 0.000 |
|                 |        | 16.876               |        | 16.871               |        | 16.851               |        | 16.833               |        | 16.825               |        | 16.830               |       |
| <b>3</b>        |        |                      | 0.000  |                      | 0.000  |                      | 0.000  |                      | 0.000  |                      | 0.000  |                      | 0.000 |
|                 | 914.4  | 0.000                | 1099.2 | 0.000                | 1262.4 | 0.000                | 1394.8 | 0.000                | 1488.4 | 0.000                | 1537.2 | 0.000                | 0.000 |
|                 |        | 14.089               |        | 14.076               |        | 14.023               |        | 13.964               |        | 13.921               |        | 13.907               |       |
| <b>4</b>        |        |                      | 0.014  |                      | 0.001  |                      | 0.002  |                      | 0.002  |                      | 0.003  |                      | 0.005 |
|                 | 1249.3 | 0.016                | 1501.4 | 0.001                | 1731.7 | 0.002                | 1923.0 | 0.002                | 2060.3 | 0.003                | 2131.8 | 0.005                | 0.005 |
|                 |        | 11.397               |        | 11.427               |        | 11.383               |        | 11.308               |        | 11.241               |        | 11.212               |       |
| <b>5</b>        |        |                      | 0.376  |                      | 0.101  |                      | 0.093  |                      | 0.137  |                      | 0.312  |                      | 0.445 |
|                 | 1496.5 | 0.409                | 1782.4 | 0.111                | 2046.3 | 0.099                | 2267.3 | 0.152                | 2426.6 | 0.365                | 2509.7 | 0.536                | 0.536 |
|                 |        | 8.752                |        | 8.887                |        | 8.897                |        | 8.804                |        | 8.667                |        | 8.574                |       |
| <b>6</b>        |        |                      | 3.735  |                      | 2.038  |                      | 1.855  |                      | 3.564  |                      | 4.228  |                      | 4.017 |
|                 | 1660.2 | 3.824                | 1953.7 | 2.121                | 2219.4 | 1.935                | 2437.5 | 3.741                | 2591.5 | 5.250                | 2671.7 | 5.908                | 5.908 |
|                 |        | 5.826                |        | 6.289                |        | 6.431                |        | 6.473                |        | 7.666                |        | 8.413                |       |
| <b>7</b>        |        |                      | 2.289  |                      | 9.205  |                      | 9.556  |                      | 1.819  |                      | 1.057  |                      | 0.708 |
|                 | 1759.7 | 5.511                | 2044.0 | 6.332                | 2297.7 | 7.213                | 2508.3 | 5.990                | 2665.2 | 3.529                | 2749.2 | 2.408                | 2.408 |
|                 |        | 11.653               |        | 2.844                |        | 2.603                |        | 11.806               |        | 13.614               |        | 14.252               |       |
| <b>8</b>        |        |                      | 0.289  |                      | 0.539  |                      | 0.383  |                      | 0.174  |                      | 0.153  |                      | 0.139 |
|                 | 1853.6 | 0.854                | 2106.9 | 1.982                | 2356.7 | 1.277                | 2577.2 | 0.466                | 2739.0 | 0.332                | 2823.2 | 0.264                | 0.264 |
|                 |        | 18.639               |        | 17.673               |        | 18.095               |        | 18.895               |        | 19.217               |        | 19.328               |       |

**Table S7.** Calculated energy levels and  $g$  ( $g_x$ ,  $g_y$ ,  $g_z$ ) tensors of the lowest Kramers doublets (KDs) of individual Dy(III) fragment for artificial structure  $[\text{Dy}(\text{Im}^{\text{DippN}})_2]^+$  with linear N–Dy–N angle.

| KDs | $E / \text{cm}^{-1}$ | $E / \text{K}$ | $g_x$ | $g_y$ | $g_z$  |
|-----|----------------------|----------------|-------|-------|--------|
| 1   | 0.0                  | 0.0            | 0.000 | 0.000 | 19.909 |
| 2   | 801.6                | 1152.8         | 0.000 | 0.000 | 16.836 |
| 3   | 1534.8               | 2207.0         | 0.000 | 0.000 | 13.907 |
| 4   | 2123.0               | 3052.8         | 0.013 | 0.014 | 11.171 |
| 5   | 2497.2               | 3591.0         | 0.835 | 1.055 | 8.307  |
| 6   | 2660.0               | 3825.0         | 8.477 | 6.905 | 3.770  |
| 7   | 2757.9               | 3965.8         | 0.333 | 1.068 | 15.005 |
| 8   | 2848.7               | 4096.4         | 0.058 | 0.087 | 19.466 |



**Table S8.** Calculated energy levels and  $g$  ( $g_x$ ,  $g_y$ ,  $g_z$ ) tensors of the lowest Kramers doublets (KDs) of individual Dy(III) fragment for artificial bis(amido) structure  $[\text{Dy}(\text{N}^{\text{RR}'})_2]^+$ .

| KDs | $E / \text{cm}^{-1}$ | $E / \text{K}$ | $g_x$ | $g_y$ | $g_z$  |
|-----|----------------------|----------------|-------|-------|--------|
| 1   | 0.0                  | 0.0            | 0.000 | 0.000 | 19.908 |
| 2   | 764.5                | 1099.3         | 0.000 | 0.000 | 16.870 |
| 3   | 1516.7               | 2181.0         | 0.000 | 0.000 | 13.914 |
| 4   | 2146.1               | 3086.1         | 0.000 | 0.000 | 11.236 |
| 5   | 2534.8               | 3645.0         | 0.140 | 0.152 | 8.828  |
| 6   | 2662.2               | 3828.2         | 2.043 | 5.168 | 12.237 |
| 7   | 2683.6               | 3859.0         | 0.949 | 5.532 | 11.346 |
| 8   | 2698.9               | 3881.0         | 0.031 | 2.356 | 16.408 |

**Table S9.** The fitting of the predicted  $U_{\text{eff}}$  versus the angles of N–Dy–N for  $[\text{Dy}(\text{Im}^{\text{DippN}})_2]^+$  fragment using a Parabola model.

| Equation | $y = A + B * X + C * X^2$ |
|----------|---------------------------|
| A        | $-12836.1 \pm 2623.6$     |
| B        | $187.4 \pm 34.9$          |
| C        | $-0.53 \pm 0.08$          |
| $R^2$    | 0.981                     |

**Table S10.** Calculated energy levels and  $g$  ( $g_x, g_y, g_z$ ) tensors of the lowest Kramers doublets (KDs) of individual Dy(III) fragment for artificial structure  $[\text{Dy}(\text{Im}^{\text{DippN}})_2(\text{THF})_4]^+$ .

| KDs | $E / \text{cm}^{-1}$ | $E / \text{K}$ | $g_x$ | $g_y$ | $g_z$  |
|-----|----------------------|----------------|-------|-------|--------|
| 1   | 0.0                  | 0.0            | 0.001 | 0.001 | 19.851 |
| 2   | 543.2                | 781.1          | 0.042 | 0.056 | 16.763 |
| 3   | 945.3                | 1359.4         | 0.936 | 4.526 | 12.969 |
| 4   | 1143.9               | 1644.9         | 4.542 | 5.458 | 10.038 |
| 5   | 1290.3               | 1855.4         | 0.395 | 1.807 | 10.998 |
| 6   | 1416.2               | 2036.6         | 0.239 | 0.826 | 17.142 |
| 7   | 1449.3               | 2084.0         | 0.381 | 0.683 | 17.561 |
| 8   | 1561.0               | 2244.6         | 0.175 | 0.230 | 18.797 |

**Table S11.** Calculated energy levels and  $g$  ( $g_x, g_y, g_z$ ) tensors of the lowest Kramers doublets (KDs) of individual Dy(III) fragment for artificial structure  $[\text{Dy}(\text{Im}^{\text{DippN}})_2(\text{THF})_3]^+$ .

| KDs | $E / \text{cm}^{-1}$ | $E / \text{K}$ | $g_x$ | $g_y$ | $g_z$  |
|-----|----------------------|----------------|-------|-------|--------|
| 1   | 0.0                  | 0.0            | 0.000 | 0.000 | 19.887 |
| 2   | 604.3                | 869.0          | 0.008 | 0.010 | 16.909 |
| 3   | 1111.0               | 1597.6         | 0.153 | 0.184 | 13.974 |
| 4   | 1456.0               | 2093.7         | 2.160 | 3.049 | 10.286 |
| 5   | 1603.9               | 2306.4         | 3.260 | 5.192 | 11.488 |
| 6   | 1681.9               | 2418.6         | 0.811 | 1.464 | 12.734 |
| 7   | 1785.8               | 2567.9         | 0.031 | 0.259 | 17.728 |
| 8   | 1879.2               | 2702.2         | 0.037 | 0.079 | 19.315 |

## 5. References

1. A. J. Wooles, D. P. Mills, W. Lewis, A. J. Blake and S. T. Liddle, Lanthanide tri-benzyl complexes: structural variations and useful precursors to phosphorus-stabilised lanthanide carbenes, *Dalton Trans.*, 2010, **39**, 500–510.
2. N. M. Kuuloja, T. M. Kymälä, J. E. Tois, R. E. Sjöholm and R. G. Franzén, Lanthanide tri benzyl complexes: structural variations and useful precursors to phosphorus-stabilised lanthanide carbenes, *Synth. Commun.*, 2011, **41**, 1052–1063.
3. M. Tamm, D. Petrovic, S. Randoll, S. Beer, T. Bannenberg, P. G. Jones and J. Grunenberg, Structural and theoretical investigation of 2-iminoimidazolines–carbene analogues of iminophosphoranes, *Org. Biomol. Chem.*, 2007, **5**, 523–530.
4. F. Aquilante, J. Autschbach, R. K. Carlson, L. F. Chibotaru, M. G. Delcey, L. De Vico, I. Fdez Galván, N. Ferré, L. M. Frutos, L. Gagliardi, M. Garavelli, A. Giussani, C. E. Hoyer, G. Li Manni, H. Lischka, D.-X. Ma, P.-Å. Malmqvist, T. Müller, A. Nenov, M. Olivucci, T. B. Pedersen, B.-D. Peng, F. Plasser, B. Pritchard, M. Reiher, I. Rivalta, I. Schapiro, J. Segarra-Martí, M. Stenrup, D. G. Truhlar, L. Ungur, A. Valentini, S. Vancoillie, V. Veryazov, V. P. Vysotskiy, O. Weingart, F. Zapata and R. Lindh, MOLCAS 8: New Capabilities for Multiconfigurational Quantum Chemical Calculations across the Periodic Table, *J. Comput. Chem.*, 2016, **37**, 506–541.
5. B. O. Roos, R. Lindh, P.-Å. Malmqvist, V. Veryazov and P.-O. Widmark, Main Group Atoms and Dimers Studied with a New Relativistic ANO Basis Set, *J. Phys. Chem. A*, 2004, **108**, 2851–2858.
6. B. O. Roos, R. Lindh, P.-Å. Malmqvist, V. Veryazov and P.-O. Widmark, New relativistic ANO basis sets for actinide atoms, *Chem. Phys. Lett.*, 2005, **409**, 295–299.
7. C. Lee, W.-T. Yang and R. G. Parr, Development of the Colic-Salvetti correlation-energy formula into a functional of the electron density, *Phys. Rev. B*, 1988, **37**, 785–789.
8. A. D. Becke, Density-functional thermochemistry. III. The role of exact exchange, *J. Chem. Phys.*, 1993, **98**, 5648–5652.
9. M. J. Frisch, G. W. Trucks, H. B. Schlegel, G. E. Scuseria, M. A. Robb, J. R. Cheeseman, G. Scalmani, V. Barone, B. Mennucci and G. A. Petersson, Gaussian 09 Rev. A.02, Wallingford, CT, 2009.
